# Supplementary material
Source: Springer Nature journal article supplement (https://www.springermedizin.de/resource/supplementary/12883_2014_1046_MOESM1_ESM.pdf/9456426)

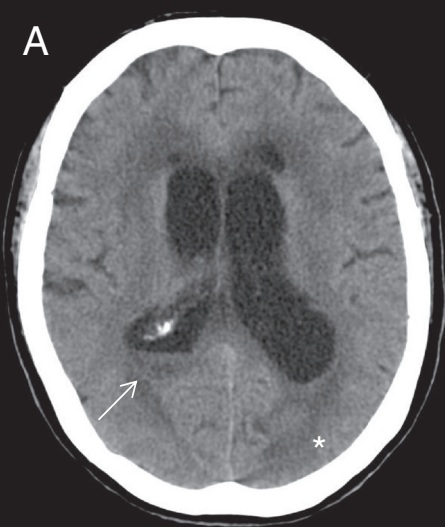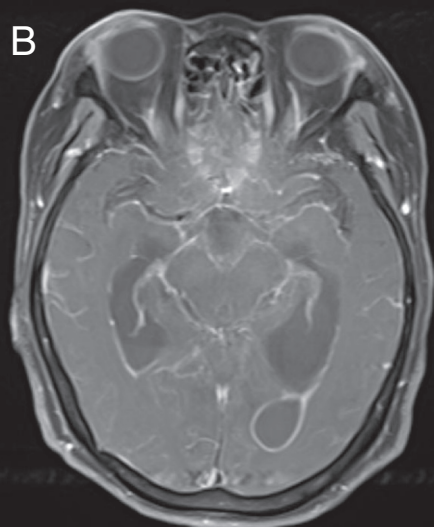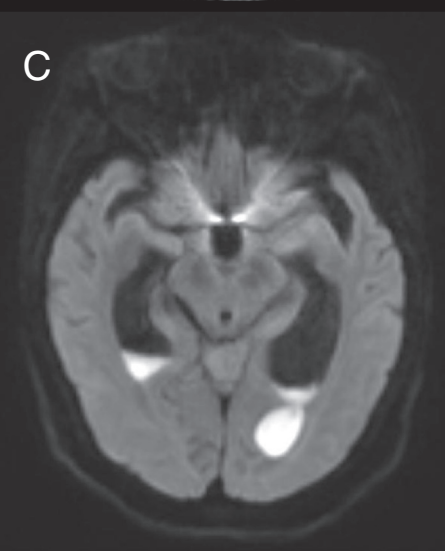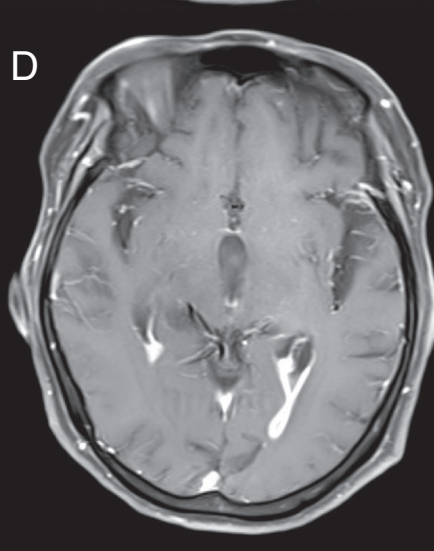

Supplement: MOESM1 [file 9456426]
